# Supplementary material
Source: Copernicus journal article supplement (doi:10.5194/acp-26-2941-2026)
Supplement: Supplementary file [file acp-26-2941-2026-supplement-title-page.pdf › acp-26-2941-2026-supplement-title-page.pdf]

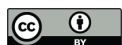

*Supplement of*

## **Surveying methane point-source super-emissions across oil and gas basins with MethaneSAT**

**Luis Guanter et al.**

*Correspondence to:* Luis Guanter ([lguanter@edf.org](mailto:lguanter@edf.org))

- [acp-26-2941-2026-supplement-title-page.pdf](#)
- [MethaneSAT\\_plumes\\_FigA1.csv](#)
- [MethaneSAT\\_plumes\\_FigA2.csv](#)

The copyright of individual parts of the supplement might differ from the article licence.
